# Supplementary material
Source: Springer Nature journal article supplement (https://www.springermedizin.de/resource/supplementary/13041_2014_288_MOESM3_ESM.pdf/25657918)

a

Development of MFC (GSE25219)

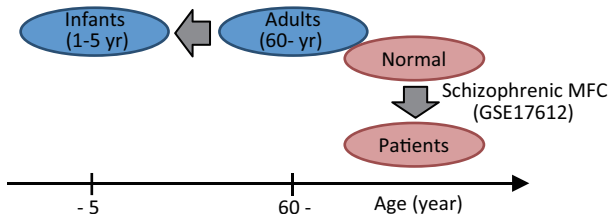

b

Infants (1-5yr) vs Adults (60yr)  
MFC (GSE25219)Schizo. vs Cont. BA10  
(GSE17612)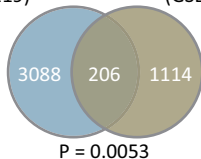

c

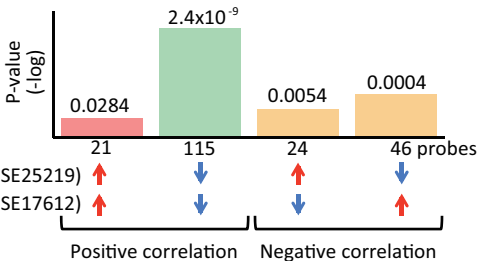

Supplement: MOESM3 [file 25657918]
